# Supplementary material for: Metabolically healthy obesity: facts and fantasies
Source: JCI journal article supplement (doi:10.1172/jci129186), 2019-09-15
Supplement: sd1 [file 1]

## SUPPLEMENTAL MATERIAL

### Method used to estimate the prevalence of metabolically healthy obesity (MHO) in previously published studies based on the stringency of selection criteria

#### *Study Selection*

Studies were eligible for inclusion if they met the following criteria:

- Obesity was defined as a BMI  $\geq 30$  kg/m<sup>2</sup>
- Participants were all adults (age  $\geq 18$  years)
- Results were from a population-based cross-sectional or longitudinal study
- MHO was defined using standard metabolic syndrome criteria according to National Cholesterol Education Program Adult Treatment Panel III (NCEP ATP III) (1), American Heart Association/National Heart, Lung and Blood Institute (AHA/NHLBI) scientific statement (2), or harmonized position stand (Harmonized criteria) (3) guidelines and/or by using the homeostatic model assessment of insulin resistance (HOMA-IR) (4).
- MHO prevalence using metabolic syndrome criteria was defined as  $\leq 2$  abnormal values out of all 5 components of the metabolic syndrome (i.e., waist circumference, blood pressure, and plasma triglyceride, HDL-cholesterol and fasting blood glucose concentrations), or  $\leq 1$  or 0 abnormal values when waist circumference was excluded from analysis (i.e.,  $\leq 1$  or 0 out of the remaining 4 components).
- Studies were performed in the United States, Canada or Europe.

Studies were excluded if they met the following criteria:

- Participants with known type 2 diabetes (5) were oversampled.
- When the same study cohort has been used in multiple studies, the results from the largest reported number of people with obesity were included.

#### *Data analysis*

Results from studies were grouped according to the following criteria to define MHO:

- $\leq 2$  Metabolic syndrome components (n=25 studies):  $\leq 2$  abnormal values when using all 5 components of the metabolic syndrome or  $\leq 1$  abnormal values when waist circumference was excluded from the analysis;
- 0 abnormal metabolic syndrome components when waist circumference was excluded from analysis (n=12);
- HOMA-IR score below (details in Tables 2 and 4) a certain cut-off value or percentile (n=11);
- 0 abnormal metabolic syndrome components when waist circumference was excluded from analysis in combination with a low HOMA-IR score (n=3).

For each of these groups, the total number of people with obesity and the number of people with MHO was extracted from the papers; the overall MHO prevalence for each of the groups was calculated as the sum of the number of people with MHO in all studies divided by the total number of people with obesity in all studies.

**Supplemental Table 1.** Studies that used  $\leq 2$  components of the metabolic syndrome or  $\leq 1$  components of the metabolic syndrome excluding waist circumference to determine the prevalence of metabolically healthy obesity (MHO)

|                            | <b>Study name</b>                                                                  | <b>Country</b> | <b>Definition of MHO</b>                                              | <b>Total number of participants with obesity</b> | <b>Number of participants with MHO</b> | <b>MHO prevalence (%)</b> |
|----------------------------|------------------------------------------------------------------------------------|----------------|-----------------------------------------------------------------------|--------------------------------------------------|----------------------------------------|---------------------------|
| Katzmarzyk et al. 2005 (6) | Aerobics Center Longitudinal Study (ACLS)                                          | USA            | $\leq 2$ NECP ATP III                                                 | 2,620                                            | 1,019                                  | 38.9                      |
| Meigs et al. 2006 (7)      | Framingham Offspring Study                                                         | USA            | $\leq 2$ AHA/NHLBI scientific statement                               | 638                                              | 236                                    | 37.0                      |
| Wildman et al. 2008 (8)    | NHANES 1999-2004                                                                   | USA            | $\leq 2$ AHA/NHLBI scientific statement                               | 1,665                                            | 651                                    | 39.1                      |
| Koster et al. 2010 (9)     | Health, Aging and Body Composition (Health ABC)                                    | USA            | $\leq 2$ AHA/NHLBI scientific statement                               | 729                                              | 224                                    | 30.7                      |
| Shea et al. 2011 (10)      | Complex Diseases in the Newfoundland population: Environment and Genetics (CODING) | Canada         | $\leq 2$ AHA/NHLBI scientific statement                               | 420                                              | 124                                    | 29.5                      |
| Pajunen et al. 2011 (11)   | Finnish type 2 diabetes (FIN-D2D) survey                                           | Finland        | $\leq 2$ Harmonized criteria                                          | 703                                              | 94                                     | 13.4                      |
| Durward et al. 2012 (12)   | <i>National Health and Nutrition Examination Survey (NHANES) III</i>               | USA            | $\leq 2$ AHA/NHLBI scientific statement                               | 1,160                                            | 513                                    | 44.2                      |
| Bradshaw et al. 2013 (13)  | Atherosclerosis Risk in Communities (ARIC)                                         | USA            | $\leq 2$ NECP ATP III                                                 | 4,024                                            | 1,602                                  | 39.8                      |
| Hinnouho et al. 2013 (14)  | Whitehall II                                                                       | UK             | $\leq 1$ AHA/NHLBI scientific statement excluding waist circumference | 638                                              | 236                                    | 37.0                      |

**Supplemental Table 1 continued.**

|  | <b>Study name</b>                                                  | <b>Country</b> | <b>Definition of MHO</b>                      | <b>Total number of participants with obesity</b> | <b>Number of participants with MHO</b> | <b>MHO prevalence (%)</b> |
|--|--------------------------------------------------------------------|----------------|-----------------------------------------------|--------------------------------------------------|----------------------------------------|---------------------------|
|  | Martinez-Larrad et al. 2014 (15)                                   | Spain          | ≤2 Harmonized criteria                        | 1,059                                            | 423                                    | 39.9                      |
|  | van Vliet-Ostaptchouk et al. 2014 (16) <sup>a</sup>                | Estonia        | ≤1 NECP ATP III excluding waist circumference | 2,053                                            | 1,035                                  | 50.4                      |
|  | National FINRISK study (DILGOM)                                    | Finland        | ≤1 NECP ATP III excluding waist circumference | 946                                              | 268                                    | 28.3                      |
|  | Health2000                                                         | Finland        | ≤1 NECP ATP III excluding waist circumference | 1,342                                            | 402                                    | 30.0                      |
|  | Cooperative Health Research in the Region of Augsburg (KORA)       | Germany        | ≤1 NECP ATP III excluding waist circumference | 786                                              | 341                                    | 43.4                      |
|  | Collaborative Health Research in South Tyrol Study (CHRIS)         | Italy          | ≤1 NECP ATP III excluding waist circumference | 130                                              | 78                                     | 60.0                      |
|  | Microisolates in South Tyrol Study (MICROS)                        | Italy          | ≤1 NECP ATP III excluding waist circumference | 157                                              | 90                                     | 57.3                      |
|  | Lifelines Cohort study                                             | Netherlands    | ≤1 NECP ATP III excluding waist circumference | 9,934                                            | 5,464                                  | 55.0                      |
|  | Prevention of Renal and Vascular End stage Disease study (PREVEND) | Netherlands    | ≤1 NECP ATP III excluding waist circumference | 1,137                                            | 456                                    | 40.1                      |

**Supplemental Table 1 continued.**

|                                                            | <b>Study name</b>                                                 | <b>Country</b> | <b>Definition of MHO</b>                      | <b>Total number of participants with obesity</b> | <b>Number of participants with MHO</b> | <b>MHO prevalence (%)</b> |
|------------------------------------------------------------|-------------------------------------------------------------------|----------------|-----------------------------------------------|--------------------------------------------------|----------------------------------------|---------------------------|
| van Vliet-Ostaptchouk et al. 2014 cont'd (16) <sup>a</sup> | Nord-Trøndelag health study (HUNT2 survey)                        | Norway         | ≤1 NECP ATP III excluding waist circumference | 9,922                                            | 4,016                                  | 40.5                      |
|                                                            | National Child Development Study (NCDS)                           | UK             | ≤1 NECP ATP III excluding waist circumference | 1,669                                            | 887                                    | 53.1                      |
| Kimokoti et al. 2015 (17)                                  | Reasons for Geographic And Racial Differences in Stroke (REGARDS) | USA            | ≤2 Harmonized criteria                        | 1,267                                            | 607                                    | 47.9                      |
| Phillips et al. 2015 (18)                                  | Cork and Kerry Diabetes and Heart Disease Study (Phase II)        | Ireland        | ≤2 NECP ATP III                               | 581                                              | 196                                    | 33.7                      |
| Goday et al. 2016 (19)                                     | Ibermutuamur Cardiovascular Risk Assessment (ICARIA) study        | Spain          | ≤2 AHA/NHLBI scientific statement             | 70,052                                           | 38,600                                 | 55.1                      |
| Kanagasabai et al. 2017 (20)                               | NHANES 2005-2008                                                  | USA            | ≤2 Harmonized criteria                        | 1,777                                            | 484                                    | 27.2                      |
| Mongraw-Chaffin et al. 2018 (21)                           | Multi-Ethnic Study of Atherosclerosis (MESA)                      | USA            | ≤2 Harmonized criteria                        | 2,254                                            | 1,051                                  | 46.6                      |
| <b>Total</b>                                               |                                                                   |                |                                               | <b>117,663</b>                                   | <b>59,097</b>                          | <b>50.2</b>               |

<sup>a</sup> Prevalence was taken from Table 4.

**Supplemental Table 2.** Studies that used the HOMA-IR score to determine the prevalence of metabolically healthy obesity (MHO)

|                               | <b>Study name</b>                                                                  | <b>Country</b> | <b>Definition of MHO<sup>a</sup></b>                                                                                       | <b>Total number of participants with obesity</b> | <b>Number of participants with MHO</b> | <b>MHO prevalence (%)</b> |
|-------------------------------|------------------------------------------------------------------------------------|----------------|----------------------------------------------------------------------------------------------------------------------------|--------------------------------------------------|----------------------------------------|---------------------------|
| Meigs et al. 2006 (7)         | Framingham Offspring Study                                                         | USA            | HOMA-IR $\leq$ 75 <sup>th</sup> percentile among all subjects                                                              | 638                                              | 283                                    | 44.3                      |
| Arnlov et al. 2011 (22)       | Uppsala Longitudinal Study of Adult Men (ULSAM)                                    | Sweden         | HOMA-IR $\leq$ 75 <sup>th</sup> percentile ( $\leq$ 3.43) among all subjects                                               | 69                                               | 21                                     | 30.4                      |
| Calori et al. 2011 (23)       | Cremona Study                                                                      | Italy          | HOMA-IR < 2.5                                                                                                              | 380                                              | 43                                     | 11.3                      |
| Shea et al. 2011 (10)         | Complex Diseases in the Newfoundland population: Environment and Genetics (CODING) | Canada         | HOMA-IR $\leq$ 25 <sup>th</sup> percentile ( $\leq$ 1.27) among all subjects                                               | 420                                              | 33                                     | 7.8                       |
| Durward et al. 2012 (12)      | <i>National Health and Nutrition Examination Survey (NHANES) III</i>               | USA            | HOMA-IR < 2.5                                                                                                              | 1,160                                            | 228                                    | 19.7                      |
| Ogorodnikova et al. 2012 (24) | Atherosclerosis Risk in Communities (ARIC) and Cardiovascular Health Studies (CHS) | USA            | HOMA-IR <25 <sup>th</sup> sex-specific percentile (<2.61 in men and <2.46 in women) among non-diabetic people with obesity | 4,323                                            | 882                                    | 20.4                      |
| Hinnouho et al. 2013 (14)     | Whitehall II                                                                       | UK             | HOMA-IR $\leq$ 75 <sup>th</sup> sex-specific percentile ( $\leq$ 1.70 in men and $\leq$ 1.52 in women) among all subjects  | 638                                              | 260                                    | 40.8                      |
| Soriguer et al. 2013 (25)     | Pizarra study                                                                      | Spain          | HOMA-IR $\leq$ 90 <sup>th</sup> percentile among all subjects                                                              | 217                                              | 123                                    | 56.7                      |

**Supplemental Table 2 continued.**

|                           | <b>Study name</b>                                                 | <b>Country</b>             | <b>Definition of MHO</b>                                | <b>Total number of participants with obesity</b> | <b>Number of participants with MHO</b> | <b>MHO prevalence (%)</b> |
|---------------------------|-------------------------------------------------------------------|----------------------------|---------------------------------------------------------|--------------------------------------------------|----------------------------------------|---------------------------|
| Arner et al. 2015 (26)    | Genome wide association (GWA) study                               | Sweden, France and Germany | HOMA-IR < 2.21                                          | 1,969                                            | 404                                    | 20.5                      |
| Kimokoti et al. 2015 (17) | Reasons for Geographic And Racial Differences in Stroke (REGARDS) | USA                        | HOMA-IR ≤75 <sup>th</sup> percentile among all subjects | 1,267                                            | 261                                    | 20.6                      |
| Phillips et al. 2015 (18) | Cork and Kerry Diabetes and Heart Disease Study (Phase II)        | Ireland                    | HOMA-IR ≤75 <sup>th</sup> percentile among all subjects | 581                                              | 218                                    | 37.5                      |
| <b>Total</b>              |                                                                   |                            |                                                         | <b>11,662</b>                                    | <b>2,756</b>                           | <b>23.6</b>               |

<sup>a</sup> For studies that defined MHO as below a certain HOMA-IR score percentile, the corresponding HOMA-IR score(s), if available, is provided in parenthesis.

**Supplemental Table 3.** Studies that used 0 components of the metabolic syndrome excluding waist circumference to determine the prevalence of metabolically healthy obesity (MHO)

|                                                    | <b>Study name</b>                                                  | <b>Country</b> | <b>Definition of MHO</b>                     | <b>Total number of participants with obesity</b> | <b>Number of participants with MHO</b> | <b>MHO prevalence (%)</b> |
|----------------------------------------------------|--------------------------------------------------------------------|----------------|----------------------------------------------|--------------------------------------------------|----------------------------------------|---------------------------|
| van Vliet-Ostapchouk et al. 2014 (16) <sup>a</sup> | Estonian Genome Project of University of Tartu (EGCUT)             | Estonia        | 0 NECP ATP III excluding waist circumference | 2,053                                            | 242                                    | 11.8                      |
|                                                    | National FINRISK study (DILGOM)                                    | Finland        | 0 NECP ATP III excluding waist circumference | 946                                              | 46                                     | 4.9                       |
|                                                    | Health2000                                                         | Finland        | 0 NECP ATP III excluding waist circumference | 1,342                                            | 76                                     | 5.7                       |
|                                                    | Cooperative Health Research in the Region of Augsburg (KORA)       | Germany        | 0 NECP ATP III excluding waist circumference | 786                                              | 98                                     | 12.5                      |
|                                                    | Collaborative Health Research in South Tyrol Study (CHRIS)         | Italy          | 0 NECP ATP III excluding waist circumference | 130                                              | 38                                     | 29.2                      |
|                                                    | Microisolates in South Tyrol Study (MICROS)                        | Italy          | 0 NECP ATP III excluding waist circumference | 157                                              | 18                                     | 11.5                      |
|                                                    | Lifelines Cohort study                                             | Netherlands    | 0 NECP ATP III excluding waist circumference | 9,934                                            | 1,808                                  | 18.2                      |
|                                                    | Prevention of Renal and Vascular End stage Disease study (PREVEND) | Netherlands    | 0 NECP ATP III excluding waist circumference | 1,137                                            | 120                                    | 10.6                      |
|                                                    | Nord-Trøndelag health study (HUNT2 survey)                         | Norway         | 0 NECP ATP III excluding waist circumference | 9,922                                            | 755                                    | 7.6                       |

**Supplemental Table 3 continued.**

|                                                            | <b>Study name</b>                                                    | <b>Country</b> | <b>Definition of MHO</b>                                       | <b>Total number of participants with obesity</b> | <b>Number of participants with MHO</b> | <b>MHO prevalence (%)</b> |
|------------------------------------------------------------|----------------------------------------------------------------------|----------------|----------------------------------------------------------------|--------------------------------------------------|----------------------------------------|---------------------------|
| van Vliet-Ostaptchouk et al. 2014 cont'd (16) <sup>a</sup> | National Child Development Study (NCDS)                              | UK             | 0 NECP ATP III excluding waist circumference                   | 1,669                                            | 305                                    | 18.3                      |
| Al-khalidi et al. 2019 (27)                                | <i>National Health and Nutrition Examination Survey (NHANES) III</i> | USA            | 0 Harmonized criteria excluding waist circumference            | 2,931                                            | 367                                    | 12.5                      |
| Kouviri et al. 2019 (28)                                   | ATTICA study                                                         | Greece         | 0 AHA/NHLBI scientific statement excluding waist circumference | 532                                              | 107                                    | 20.1                      |
| <b>Total</b>                                               |                                                                      |                |                                                                | <b>31,539</b>                                    | <b>3,980</b>                           | <b>12.6</b>               |

<sup>a</sup> Prevalence was taken from Table 4.

**Supplemental Table 4.** Studies that used 0 metabolic syndrome criteria excluding waist circumference in combination with a low HOMA-IR score to determine the prevalence of metabolically healthy obesity (MHO)

|                           | <b>Study name</b>                                                                     | <b>Country</b> | <b>Definition of MHO</b>                                                                                      | <b>Total number of participants with obesity</b> | <b>Number of participants with MHO</b> | <b>MHO prevalence (%)</b> |
|---------------------------|---------------------------------------------------------------------------------------|----------------|---------------------------------------------------------------------------------------------------------------|--------------------------------------------------|----------------------------------------|---------------------------|
| Kuk et al. 2009 (29)      | <i>National Health and Nutrition Examination Survey (NHANES) III</i>                  | USA            | 0 AHA/NHLBI ATP III excluding waist circumference and HOMA-IR < 2.5                                           | 1,302                                            | 78                                     | 6.0                       |
| Soriguer et al. 2013 (25) | Pizarra study                                                                         | Spain          | 0 NECP ATP III excluding waist circumference and HOMA-IR ≤90 <sup>th</sup> percentile among all subjects      | 217                                              | 23                                     | 10.6                      |
| Green et al. 2014 (30)    | Framingham Heart Study Offspring (1998-2001) and Third Generation (2002-2005) cohorts | USA            | 0 AHA/NHLBI ATP III excluding waist circumference and HOMA-IR ≤75 <sup>th</sup> percentile among all subjects | 1,285                                            | 90                                     | 7.0                       |
| <b>Total</b>              |                                                                                       |                |                                                                                                               | <b>2,804</b>                                     | <b>191</b>                             | <b>6.8</b>                |

## SUPPLEMENTAL REFERENCES

1. National Cholesterol Education Program. Third Report of the National Cholesterol Education Program (NCEP) Expert Panel on Detection, Evaluation, and Treatment of High Blood Cholesterol in Adults (Adult Treatment Panel III) final report. *Circulation*. 2002;106(25):3143-3421.
2. Grundy, SM, et al. Diagnosis and management of the metabolic syndrome: an American Heart Association/National Heart, Lung, and Blood Institute Scientific Statement. *Circulation*. 2005;112(17):2735-2752.
3. Alberti, KG, et al. Harmonizing the metabolic syndrome: a joint interim statement of the International Diabetes Federation Task Force on Epidemiology and Prevention; National Heart, Lung, and Blood Institute; American Heart Association; World Heart Federation; International Atherosclerosis Society; and International Association for the Study of Obesity. *Circulation*. 2009;120(16):1640-1645.
4. Matthews, DR, et al. Homeostasis model assessment: insulin resistance and beta-cell function from fasting plasma glucose and insulin concentrations in man. *Diabetologia*. 1985;28(7):412-419.
5. de Rooij, BH, et al. Physical Activity and Sedentary Behavior in Metabolically Healthy versus Unhealthy Obese and Non-Obese Individuals - The Maastricht Study. *PLoS One*. 2016;11(5):e0154358.
6. Katzmarzyk, PT, Church, TS, Janssen, I, Ross, R, Blair, SN. Metabolic syndrome, obesity, and mortality: impact of cardiorespiratory fitness. *Diabetes Care*. 2005;28(2):391-397.
7. Meigs, JB, et al. Body mass index, metabolic syndrome, and risk of type 2 diabetes or cardiovascular disease. *J Clin Endocrinol Metab*. 2006;91(8):2906-2912.
8. Wildman, RP, et al. The obese without cardiometabolic risk factor clustering and the normal weight with cardiometabolic risk factor clustering: prevalence and correlates of 2 phenotypes among the US population (NHANES 1999-2004). *Arch Intern Med*. 2008;168(15):1617-1624.
9. Koster, A, et al. Body fat distribution and inflammation among obese older adults with and without metabolic syndrome. *Obesity (Silver Spring)*. 2010;18(12):2354-2361.
10. Shea, JL, Randell, EW, Sun, G. The prevalence of metabolically healthy obese subjects defined by BMI and dual-energy X-ray absorptiometry. *Obesity (Silver Spring)*. 2011;19(3):624-630.
11. Pajunen, P, et al. Metabolically healthy and unhealthy obesity phenotypes in the general population: the FIN-D2D Survey. *BMC Public Health*. 2011;11(754).
12. Durward, CM, Hartman, TJ, Nickols-Richardson, SM. All-cause mortality risk of metabolically healthy obese individuals in NHANES III. *J Obes*. 2012;2012(460321).
13. Bradshaw, PT, Monda, KL, Stevens, J. Metabolic syndrome in healthy obese, overweight, and normal weight individuals: the Atherosclerosis Risk in Communities Study. *Obesity (Silver Spring)*. 2013;21(1):203-209.
14. Hinnouho, GM, et al. Metabolically healthy obesity and risk of mortality: does the definition of metabolic health matter? *Diabetes Care*. 2013;36(8):2294-2300.
15. Martinez-Larrad, MT, et al. Profile of individuals who are metabolically healthy obese using different definition criteria. A population-based analysis in the Spanish population. *PLoS One*. 2014;9(9):e106641.
16. van Vliet-Ostapchouk, JV, et al. The prevalence of metabolic syndrome and metabolically healthy obesity in Europe: a collaborative analysis of ten large cohort studies. *BMC Endocr Disord*. 2014;14(9).
17. Kimokoti, RW, Judd, SE, Shikany, JM, Newby, PK. Metabolically Healthy Obesity Is Not Associated with Food Intake in White or Black Men. *J Nutr*. 2015;145(11):2551-2561.
18. Phillips, CM, Perry, IJ. Lipoprotein particle subclass profiles among metabolically healthy and unhealthy obese and non-obese adults: does size matter? *Atherosclerosis*. 2015;242(2):399-406.
19. Goday, A, et al. Prevalence and clinical characteristics of metabolically healthy obese individuals and other obese/non-obese metabolic phenotypes in a working population: results from the Icaria study. *BMC Public Health*. 2016;16(248).
20. Kanagasabai, T, Dhanoa, R, Kuk, JL, Ardern, CI. Association between Sleep Habits and Metabolically Healthy Obesity in Adults: A Cross-Sectional Study. *J Obes*. 2017;2017(5272984).

21. Mongraw-Chaffin, M, et al. Metabolically Healthy Obesity, Transition to Metabolic Syndrome, and Cardiovascular Risk. *J Am Coll Cardiol*. 2018;71(17):1857-1865.
22. Arnlov, J, Sundstrom, J, Ingelsson, E, Lind, L. Impact of BMI and the metabolic syndrome on the risk of diabetes in middle-aged men. *Diabetes Care*. 2011;34(1):61-65.
23. Calori, G, et al. Prevalence, metabolic features, and prognosis of metabolically healthy obese Italian individuals: the Cremona Study. *Diabetes Care*. 2011;34(1):210-215.
24. Ogorodnikova, AD, et al. Incident cardiovascular disease events in metabolically benign obese individuals. *Obesity (Silver Spring)*. 2012;20(3):651-659.
25. Soriguer, F, et al. Metabolically healthy but obese, a matter of time? Findings from the prospective Pizarra study. *J Clin Endocrinol Metab*. 2013;98(6):2318-2325.
26. Arner, P, Ryden, M. Fatty Acids, Obesity and Insulin Resistance. *Obes Facts*. 2015;8(2):147-155.
27. Al-Khalidi, B, Kimball, SM, Kuk, JL, Ardern, CI. Metabolically healthy obesity, vitamin D, and all-cause and cardiometabolic mortality risk in NHANES III. *Clin Nutr*. 2019;38(2):820-828.
28. Kouvari, M, et al. Transition from metabolically benign to metabolically unhealthy obesity and 10-year cardiovascular disease incidence: The ATTICA cohort study. *Metabolism*. 2019;93(18-24).
29. Kuk, JL, Ardern, CI. Are metabolically normal but obese individuals at lower risk for all-cause mortality? *Diabetes Care*. 2009;32(12):2297-2299.
30. Green, AK, et al. Sugar-sweetened beverages and prevalence of the metabolically abnormal phenotype in the Framingham Heart Study. *Obesity (Silver Spring)*. 2014;22(5):E157-163.
